# Supplementary material
Source: HighWire-hosted journal article supplement (https://jnm.snmjournals.org/highwire/filestream/102161/field_highwire_adjunct_files/0/249078_Supplemental_Data.pdf)
Supplement: 249078_Supplemental_Data.pdf [file 249078_Supplemental_Data.pdf]

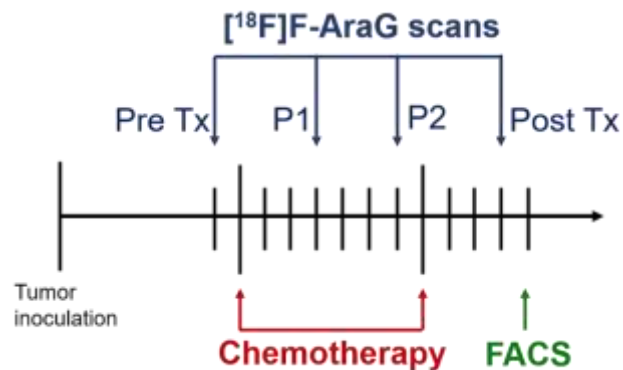

**Supplemental Fig. 1.** [<sup>18</sup>F]F-AraG longitudinal imaging of MC38 bearing mice undergoing chemotherapy. The chemotherapy was administered once a week for two weeks. Mice were imaged one day before the start of therapy (Pre Tx) and then 3 (P1) and 6 (P2) days after the first, and 3 days after the second chemotherapy administration (Post Tx).

| Marker | Fluorochrome            | Clone    | Company             |
|--------|-------------------------|----------|---------------------|
| CD45   | Alexa Fluor 700         | 30-F11   | Biolegend<br>103128 |
| CD4    | APC Cy7                 | GK1.5    | Biolegend<br>100414 |
| CD8    | PerCP                   | 53-6.7   | Biolegend<br>100732 |
| PD-1   | Brilliant Violet<br>605 | 29F.1A12 | Biolegend<br>135220 |
| FoxP3  | PE                      | 150D     | Biolegend<br>320008 |

**Supplemental Table 1.** Antibodies used for FACS analysis of tumor infiltrating lymphocytes

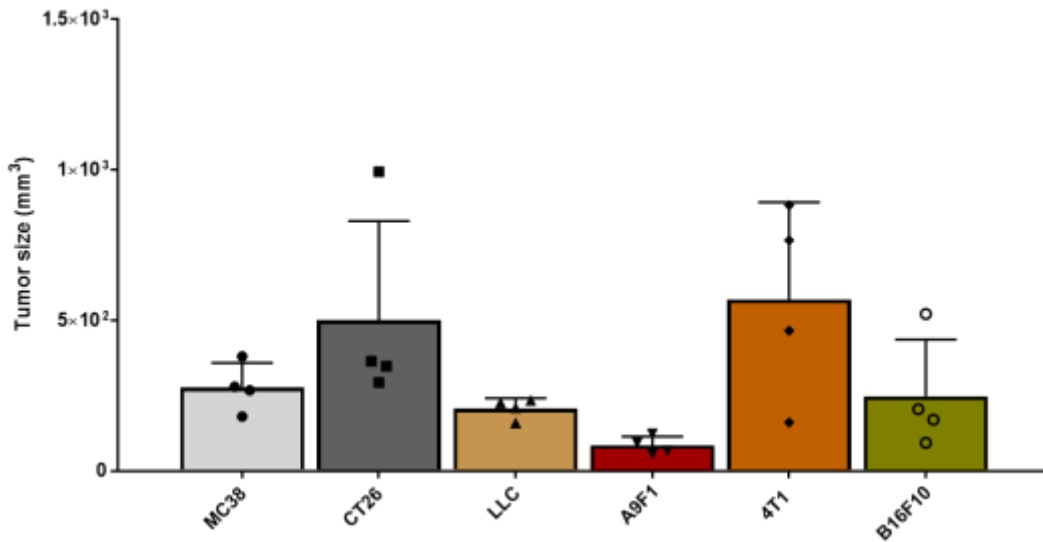

**Supplemental Fig. 2.** Tumor size prior to imaging differed between different tumor types and individual mice. The smallest sizes were recorded A9F1 tumors and the largest for 4T1 model.

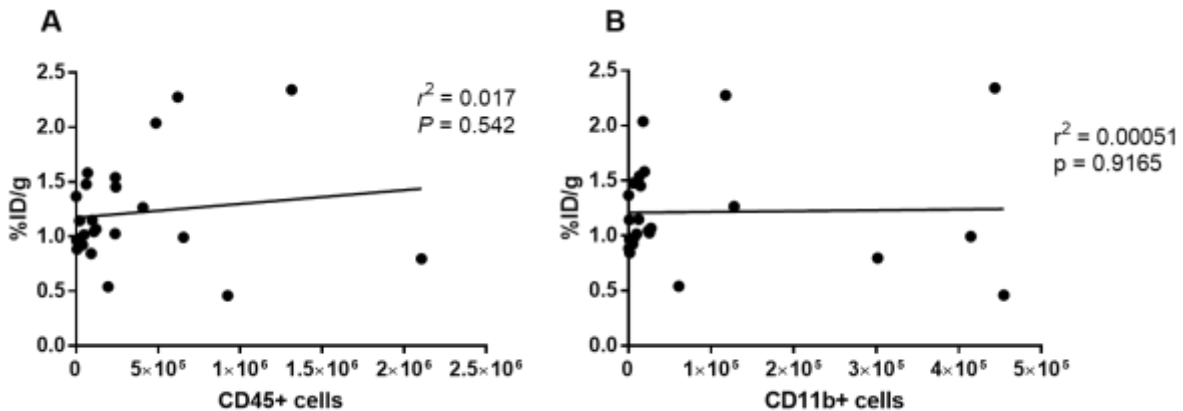

**Supplemental Fig. 3.** Correlation of the [<sup>18</sup>F]F-AraG signal with the number of immune cells present in the TME. **A.** The [<sup>18</sup>F]F-AraG signal showed no correlation with the number of total lymphocytes found in the TME. **B.** The [<sup>18</sup>F]F-AraG signal showed no correlation with the number of CD11b+ cells found in the TME. CD11b is marker expressed on a variety of cells including macrophages, granulocytes and NK cells.

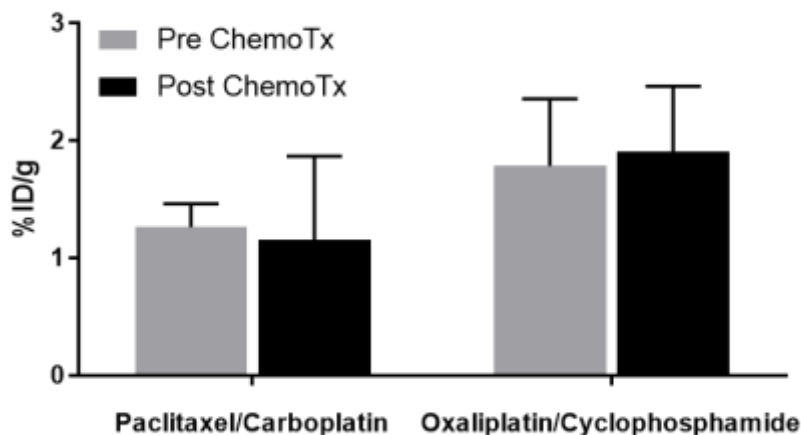

**Supplemental Fig. 4.** The effects of chemotherapy in 4T1 tumor model. Neither paclitaxel/carboplatin or oxaliplatin/cyclophosphamide treatment led to a significant increase in [ $^{18}\text{F}$ ]F-AraG signal post therapy.

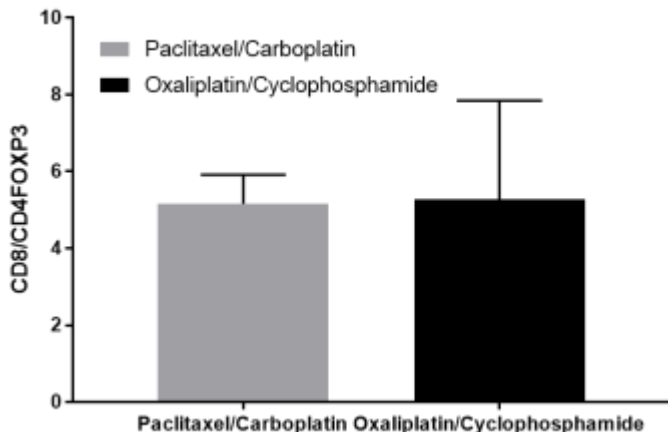

**Supplemental Fig. 5.** The effects of chemotherapy on the CD8/CD4FOXP3 ratio in A9F1 tumor model. The ratio of CD8+ to CD4FOXP3 cells was not significantly different between the groups of mice treated with paclitaxel/carboplatin and oxaliplatin/cyclophosphamide.
